# Supplementary material
Source: publisher figshare collection journal article supplement (https://acs.figshare.com/ndownloader/files/13125746)
Supplement: Supplementary file 1 [file 13125746]

## Supporting Information

**Table S1 (1). Regular Indices of Water Quality, Their Limitations and Detection Values**

| Index                                                    | Limitation   | detection value         |
|----------------------------------------------------------|--------------|-------------------------|
| 1. Microorganism indices <sup>a</sup>                    |              |                         |
| Total coliform group/(MPN/100mL or CFU/100 MI)           | Not detected | Not detected            |
| Heat resisiting conliform group/(MPN/100mL or CFU/100mL) | Not detected | Not detected            |
| Escherichia coil/(MPN/100mL or CFU/100mL)                | Not detected | Not detected            |
| Aerobic bacteria count/(CFU/mL)                          | 100          | less than<br>Limitation |

**Table S1 (2). Regular Indices of Water Quality, Their Limitations and Detection Values**

| Index                                                                    | Limitation                                    | detection value      |
|--------------------------------------------------------------------------|-----------------------------------------------|----------------------|
| 2.Toxicological indices                                                  |                                               |                      |
| As/(mg/L)                                                                | 0.01                                          | less than Limitation |
| Cd/(mg/L)                                                                | 0.005                                         | less than Limitation |
| Cr(sexavalence)/(mg/L)                                                   | 0.05                                          | less than Limitation |
| Pb/(mg/L)                                                                | 0.01                                          | less than Limitation |
| Ag/(mg/L)                                                                | 0.001                                         | less than Limitation |
| Se/(mg/L)                                                                | 0.01                                          | less than Limitation |
| Cyanidium/(mg/L)                                                         | 0.05                                          | less than Limitation |
| Fluoride/(mg/L)                                                          | 1                                             | less than Limitation |
|                                                                          | 10                                            |                      |
| Nitrate(counted "N")/(mg/L)                                              | If the groundwater source is confined,then 20 | less than Limitation |
| Chloroform/(mg/L)                                                        | 0.06                                          | less than Limitation |
| Carbon tetrachloride/(mg/L)                                              | 0.002                                         | less than Limitation |
| Bromate(when using ozone)/(mg/L)                                         | 0.01                                          | less than Limitation |
| Formaldehyde(when using ozone)/(mg/L)                                    | 0.9                                           | less than Limitation |
| Chlorite(when using chlorine dioxide for sterilization)/(mg/L)           | 0.7                                           | less than Limitation |
| Chlorite(when using composite chlorine dioxide for sterilization)/(mg/L) | 0.7                                           | less than Limitation |

**Table S1 (3). Regular Indices of Water Quality, Their Limitations and Detection Values**

| Index                                                                          | Limitation                                                                             | detection value      |
|--------------------------------------------------------------------------------|----------------------------------------------------------------------------------------|----------------------|
| 3.Sensitive property and general chemical index                                |                                                                                        |                      |
| Chroma(platinum/cobalt chroma unit)                                            | 15                                                                                     | less than Limitation |
| Turbidness(scattered turbidness unit)/NTU                                      | 1<br>If confined by water source and water purification conditions,then 3              | less than Limitation |
| Odor and sapor                                                                 | Free from any odor and sapor                                                           | No                   |
| Visible matters(unaided eye)                                                   | No                                                                                     | No                   |
| pH                                                                             | Not less than 6.5 and not larger than 8.5                                              | in the Limitation    |
| Al/(mg/L)                                                                      | 0.2                                                                                    | less than Limitation |
| Fe/(mg/L)                                                                      | 0.3                                                                                    | less than Limitation |
| Mn/(mg/L)                                                                      | 0.1                                                                                    | less than Limitation |
| Cu/(mg/L)                                                                      | 1                                                                                      | less than Limitation |
| Zn/(mg/L)                                                                      | 1                                                                                      | less than Limitation |
| Chloride/(mg/L)                                                                | 250                                                                                    | less than Limitation |
| Sulfate/(mg/L)                                                                 | 250                                                                                    | less than Limitation |
| Total soluble solid/(mg/L)                                                     | 1000                                                                                   | less than Limitation |
| Total hardness(CaCO <sub>3</sub> )/(mg/L)                                      | 450                                                                                    | less than Limitation |
| Oxygen consumption(COD <sub>Mn</sub> method,counted as O <sub>2</sub> )/(mg/L) | 3<br>Restrict in the water source, if untreated water oxygen consumption>6mg/L, then 5 | less than Limitation |
| Volatile phenol/(mg/L)                                                         | 0.002                                                                                  | less than Limitation |
| Anion synthetic detergent/(mg/L)                                               | 0.3                                                                                    | less than Limitation |

**Table S1 (4). Regular Indices of Water Quality, Their Limitations and Detection Values**

| Index                                                                                                                                                                                                                                                                                                                                                                                                                                                                                                           | Limitation     | detection value      |
|-----------------------------------------------------------------------------------------------------------------------------------------------------------------------------------------------------------------------------------------------------------------------------------------------------------------------------------------------------------------------------------------------------------------------------------------------------------------------------------------------------------------|----------------|----------------------|
| 4. Radioactive indices <sup>b</sup>                                                                                                                                                                                                                                                                                                                                                                                                                                                                             | Guidance value |                      |
| Total $\alpha$ radioactivity/(Bq/L)                                                                                                                                                                                                                                                                                                                                                                                                                                                                             | 0.5            | less than Limitation |
| Total $\beta$ radioactivity/(Bq/L)                                                                                                                                                                                                                                                                                                                                                                                                                                                                              | 1              | less than Limitation |
| <p>a. MPN means most probable number; CFU means colony forming unit. If total coliform group is detected in the water sample, escherichia coil or heat resisting coliform group shall be examined further; if total coliform group is not detected, then it's not necessary to examine escherichia coil or heat resisting coliform group.</p> <p>b. If the radioactive index exceed the guidance value, then it's necessary to analyze and evaluate the nuclide and to judge whether it's drinkable or not.</p> |                |                      |

**Table S2. Concentration of Five Sex Hormones in Rat Urine**

| Times (day) | Groups | Concentration (mean±SD, n=10) (ng/mL) |                          |                          |                         |            |
|-------------|--------|---------------------------------------|--------------------------|--------------------------|-------------------------|------------|
|             |        | Dehydroepiandrosterone                | Androstenedione          | Testosterone             | Dihydrotestosterone     | Estrone    |
| 0d          | NC     | 20.17±6.07                            | 13.91±4.11               | 29.03±10.05              | 11.61±3.64              | 11.79±3.50 |
|             | MIXPs  | 18.27±6.07                            | 12.91±5.24               | 29.73±9.50               | 12.80±5.24              | 11.73±2.95 |
| 30d         | NC     | 17.91±5.75                            | 12.82±4.21               | 28.90±9.52               | 11.05±3.82              | 9.89±3.71  |
|             | MIXPs  | 24.67±10.32                           | 15.26±5.80               | 34.91±13.58              | 13.42±5.10              | 12.01±4.28 |
| 60d         | NC     | 20.30±6.52                            | 14.59±5.61               | 27.10±10.00              | 9.84±3.82               | 7.31±5.85  |
|             | MIXPs  | 30.10±7.80 <sup>a</sup>               | 21.90±10.71 <sup>a</sup> | 47.58±11.62              | 18.64±8.81 <sup>a</sup> | 11.47±4.79 |
| 90d         | NC     | 20.95±5.45                            | 13.77±3.98               | 27.17±7.85               | 12.79±4.08              | 8.77±4.20  |
|             | MIXPs  | 38.10±14.97 <sup>a</sup>              | 26.80±10.43 <sup>a</sup> | 51.64±14.41 <sup>a</sup> | 22.86±8.56 <sup>a</sup> | 11.50±4.07 |

NC: normal control group; MIXPs: phthalates mixtures treated group; <sup>a</sup> :  $P<0.05$ , compared with NC.

**Table S3. Concentration of Creatinine in Rat Urine**

| Times (day) | Groups             | Concentration (mean $\pm$ SD, n=10) ( $\mu$ mol/L) |
|-------------|--------------------|----------------------------------------------------|
|             |                    | Creatinine                                         |
| 0d          | NC <sup>a</sup>    | 0.79 $\pm$ 0.26                                    |
|             | MIXPs <sup>b</sup> | 0.76 $\pm$ 0.30                                    |
| 30d         | NC <sup>a</sup>    | 0.72 $\pm$ 0.25                                    |
|             | MIXPs <sup>b</sup> | 0.90 $\pm$ 0.37                                    |
| 60d         | NC <sup>a</sup>    | 0.76 $\pm$ 0.29                                    |
|             | MIXPs <sup>b</sup> | 0.91 $\pm$ 0.44                                    |
| 90d         | NC <sup>a</sup>    | 0.80 $\pm$ 0.25                                    |
|             | MIXPs <sup>b</sup> | 0.95 $\pm$ 0.38                                    |

a: NC - normal control group

b: MIXPs - phthalates mixtures treated group
